# Supplementary figures and images for: Kisspeptin Influences the Reproductive Axis and Circulating Levels of microRNAs in Senegalese Sole
Source: MDPI journal article supplement (doi:10.3390/ijms21239051), 2020-11-28

A

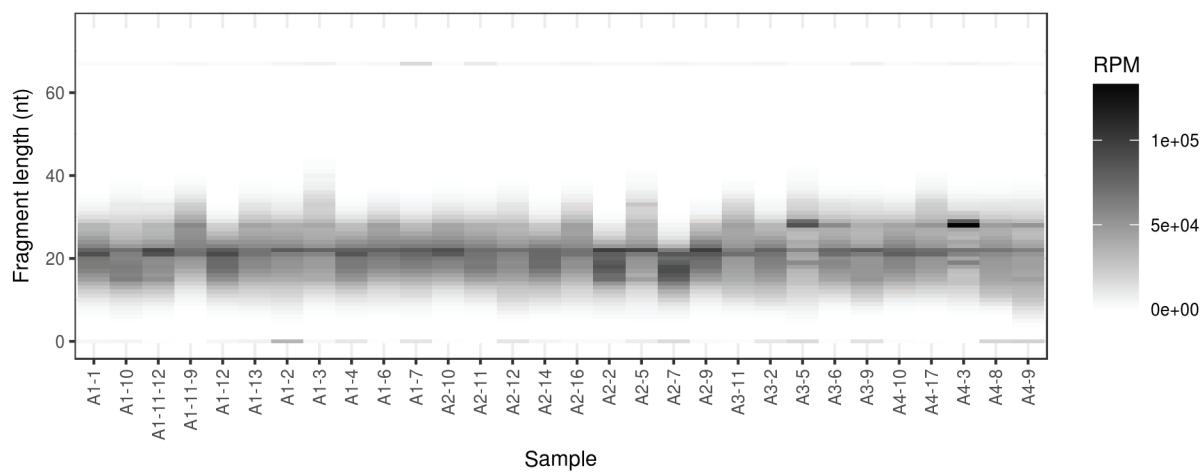

B

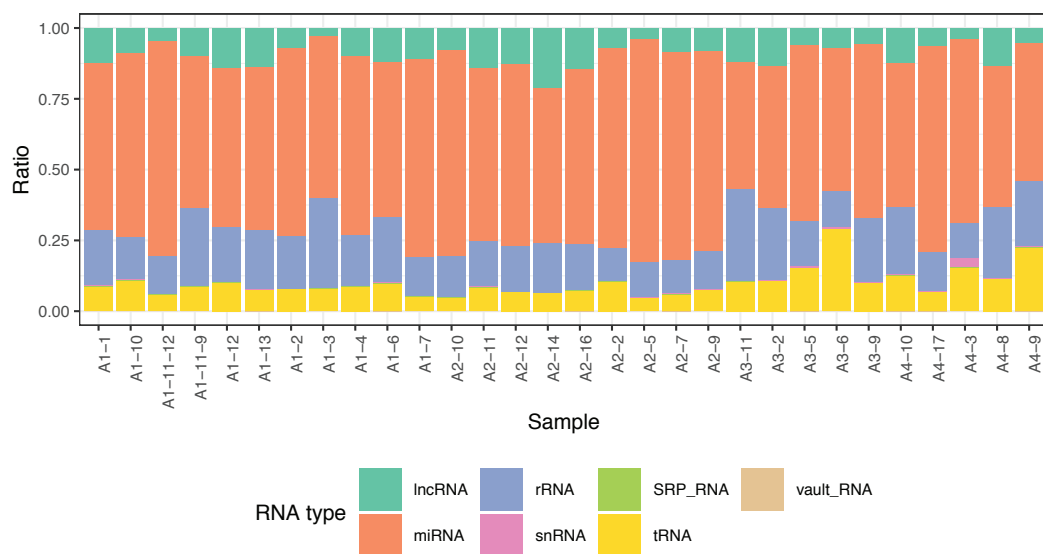

Supplement: s1 [file s1]
